# Supplementary material for: Breast cancer stem cell-like cells generated during TGFβ-induced EMT are radioresistant
Source: PubMed Central journal article supplement (PMC5955125; doi:10.18632/oncotarget.25240), 2018-05-04
Supplement: oncotarget-09-23519-s001.pdf [file oncotarget-09-23519-s001.pdf]

## Breast cancer stem cell-like cells generated during TGF $\beta$ -induced EMT are radioresistant

### SUPPLEMENTARY MATERIALS

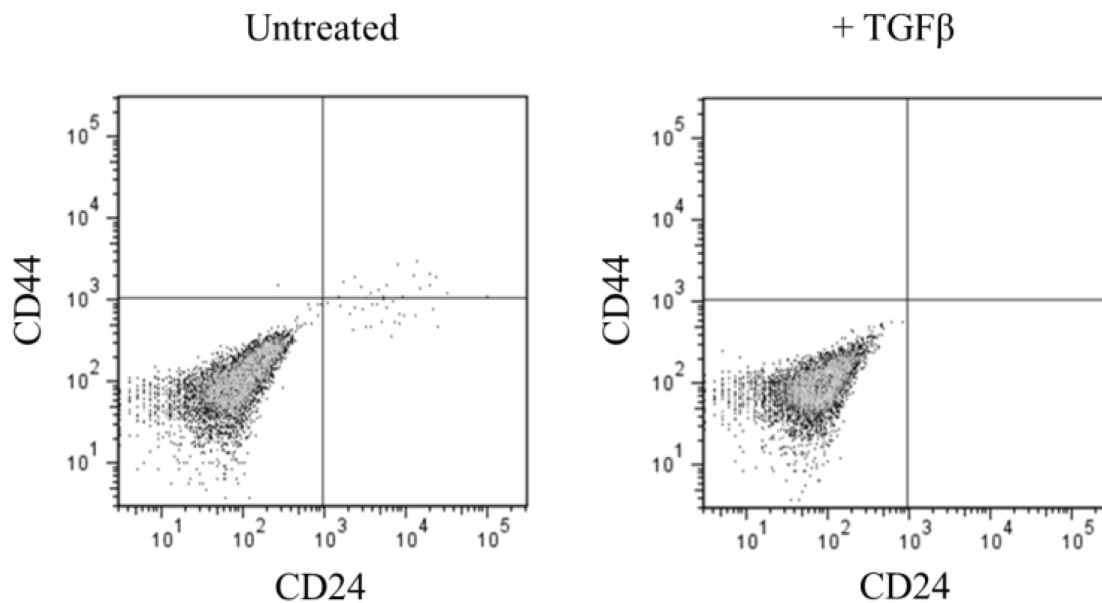

Supplementary Figure 1: Isotypic controls for Figure 1B in which CD24 and CD44 labellings of HMLE cells is shown for parental cells (left) and TGF $\beta$ -induced cells (right).

|               | CD24 <sup>-low</sup> /CD44 <sup>+</sup> | CD24 <sup>+</sup> /CD44 <sup>low</sup> |
|---------------|-----------------------------------------|----------------------------------------|
| 0 Gy          | 1 $\pm$ 0.11                            | 1.26 $\pm$ 0.23                        |
| 10 Gy (day 4) | 1.70 $\pm$ 0.31                         | 5.01 $\pm$ 1.25                        |

Supplementary Figure 2: Relative mean fluorescence intensities of the FACS analyses presented in Figure 2C for the cleaved caspase 3. Mean fluorescence intensity detected in control CD24<sup>-low</sup>/CD44<sup>+</sup> cells were used for the normalization (to 1). Results correspond to the mean  $\pm$  SD of 3 independent experiments.

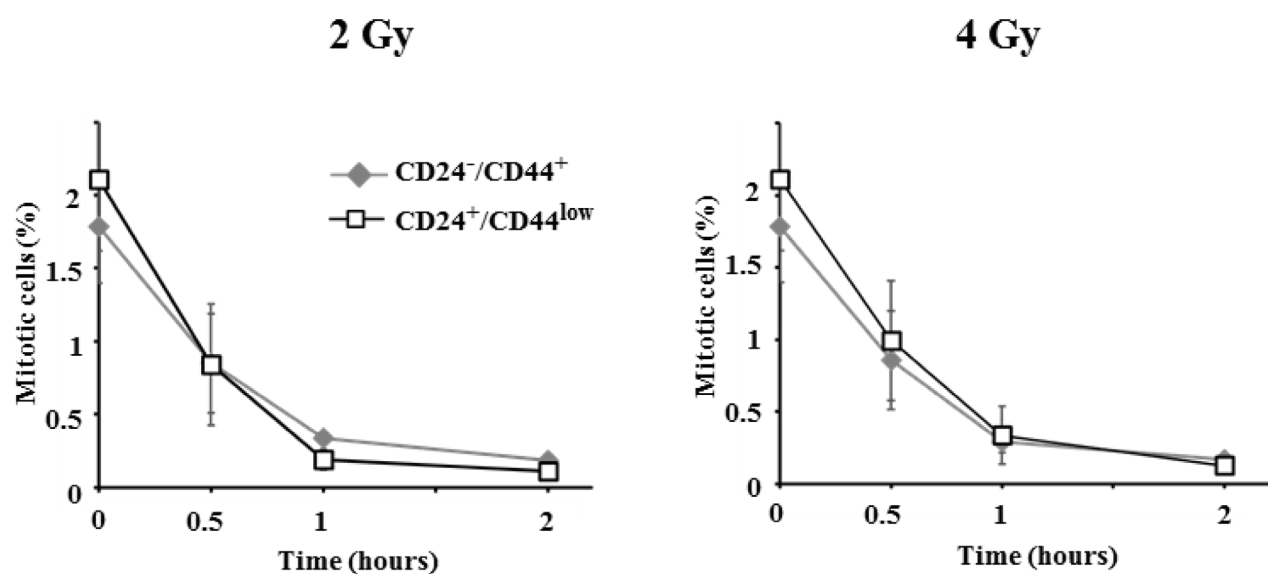

**Supplementary Figure 3: Initial time course of the mitotic index of CD24<sup>+</sup>/CD44<sup>low</sup> and CD24<sup>-</sup>/CD44<sup>+</sup> cells upon irradiation.** The mitotic indexes were determined by phospho-histone H3 labelling in independent experiments ( $n = 2$  for the 2 Gy and  $n = 3$  for the 4 Gy series) and resulting means and standard deviations were plotted.

|               | CD24 <sup>-</sup> /CD44 <sup>+</sup> | CD24 <sup>+</sup> /CD44 <sup>low</sup> |
|---------------|--------------------------------------|----------------------------------------|
| 0 Gy          | 1 ± 0.23                             | 7.02 ± 0.83                            |
| 10 Gy (day 2) | 1.12 ± 0.18                          | 7.95 ± 1.85                            |

**Supplementary Figure 4: Relative mean fluorescence intensities corresponding to DCF-DA FACS analyses presented in Figure 5A and 5C.** Mean fluorescence intensities detected in CD24<sup>-</sup>/CD44<sup>+</sup> cells were normalized to 1. Results correspond to the mean ± SD of 3 independent experiments.

|        |                                         | Day           |                |                |                 |                  |
|--------|-----------------------------------------|---------------|----------------|----------------|-----------------|------------------|
|        |                                         | 0             | 1              | 2              | 3               | 4                |
| SOD1   | CD24 <sup>-low</sup> /CD44 <sup>+</sup> | 1.93 +/- 0.41 | 1.55 +/- 0.44  | 0.86 +/- 0.10  | 1.01 +/- 0.22   | 1.02 +/- 0.13    |
|        | CD24 <sup>+</sup> /CD44 <sup>low</sup>  | 1 +/- 0.22    | 1.04 +/- 0.11  | 0.94 +/- 0.35  | 0.91 +/- 0.24   | 0.84 +/- 0.12    |
| SOD2   | CD24 <sup>-low</sup> /CD44 <sup>+</sup> | 3.02 +/- 0.12 | 3.29 +/- 1.21  | 5.80 +/- 1.79  | 9.52 +/- 2.13   | 14.36 +/- 1.57   |
|        | CD24 <sup>+</sup> /CD44 <sup>low</sup>  | 1 +/- 0.12    | 1.61 +/- 0.95  | 1.71 +/- 0.44  | 2.67 +/- 1.09   | 3.79 +/- 1.09    |
| HMOX1  | CD24 <sup>-low</sup> /CD44 <sup>+</sup> | 6.21 +/- 0.85 | 5.94 +/- 1.11  | 7.07 +/- 0.54  | 13.52 +/- 3.02  | 11.72 +/- 3.56   |
|        | CD24 <sup>+</sup> /CD44 <sup>low</sup>  | 1 +/- 0.16    | 1.25 +/- 0.84  | 1.50 +/- 0.45  | 1.79 +/- 0.02   | 2.92 +/- 1.02    |
| GPX1   | CD24 <sup>-low</sup> /CD44 <sup>+</sup> | 1.65 +/- 0.45 | 1.96 +/- 0.68  | 1.65 +/- 0.11  | 1.52 +/- 0.76   | 2.00 +/- 0.47    |
|        | CD24 <sup>+</sup> /CD44 <sup>low</sup>  | 1 +/- 0.33    | 1.01 +/- 0.49  | 1.06 +/- 0.21  | 1.22 +/- 0.26   | 1.14 +/- 0.50    |
| GSR    | CD24 <sup>-low</sup> /CD44 <sup>+</sup> | 2.10 +/- 0.32 | 1.84 +/- 0.25  | 1.88 +/- 0.10  | 1.76 +/- 0.34   | 1.73 +/- 0.38    |
|        | CD24 <sup>+</sup> /CD44 <sup>low</sup>  | 1 +/- 0.22    | 1.15 +/- 0.17  | 0.88 +/- 0.17  | 0.80 +/- 0.16   | 0.86 +/- 0.11    |
| NQO1   | CD24 <sup>-low</sup> /CD44 <sup>+</sup> | 1.43 +/- 0.29 | 1.58 +/- 0.30  | 1.64 +/- 0.23  | 1.54 +/- 0.05   | 1.43 +/- 0.03    |
|        | CD24 <sup>+</sup> /CD44 <sup>low</sup>  | 1 +/- 0.00    | 0.87 +/- 0.13  | 0.73 +/- 0.16  | 0.88 +/- 0.14   | 0.85 +/- 0.13    |
| TXNRD1 | CD24 <sup>-low</sup> /CD44 <sup>+</sup> | 1.98 +/- 0.21 | 1.88 +/- 0.51  | 1.79 +/- 0.42  | 2.08 +/- 0.46   | 2.07 +/- 0.27    |
|        | CD24 <sup>+</sup> /CD44 <sup>low</sup>  | 1 +/- 0.13    | 0.81 +/- 0.08  | 1.05 +/- 0.23  | 1.22 +/- 0.38   | 1.40 +/- 0.28    |
| MT3    | CD24 <sup>-low</sup> /CD44 <sup>+</sup> | 3.45 +/- 1.01 | 10.39 +/- 2.47 | 16.72 +/- 4.16 | 26.41 +/- 6.58  | 30.84 +/- 7.70   |
|        | CD24 <sup>+</sup> /CD44 <sup>low</sup>  | 1 +/- 0.21    | 4.69 +/- 1.26  | 5.47 +/- 2.27  | 7.81 +/- 2.57   | 10.61 +/- 4.79   |
| NOS2   | CD24 <sup>-low</sup> /CD44 <sup>+</sup> | 1.20 +/- 0.46 | 8.03 +/- 1.50  | 32.66 +/- 6.62 | 57.30 +/- 5.91  | 127.17 +/- 15.85 |
|        | CD24 <sup>+</sup> /CD44 <sup>low</sup>  | 1 +/- 0.05    | 7.55 +/- 0.90  | 28.50 +/- 9.35 | 46.43 +/- 16.22 | 128.37 +/- 17.45 |
| NME5   | CD24 <sup>-low</sup> /CD44 <sup>+</sup> | 2.20 +/- 0.56 | 2.13 +/- 0.50  | 26.69 +/- 4.70 | 43.15 +/- 6.65  | 49.92 +/- 7.57   |
|        | CD24 <sup>+</sup> /CD44 <sup>low</sup>  | 1 +/- 0.35    | 1.71 +/- 0.52  | 21.81 +/- 5.60 | 42.13 +/- 7.74  | 55.24 +/- 6.89   |

**Supplementary Figure 5: Quantification of the expression, measured by RT-PCR, for 10 genes involved in the control of oxidative stress balance, before and during the 4 days following irradiation (numerical data for Figure 5E).** Normalization was performed as indicated in materials and methods. For each gene, expression at day 0 in CD24<sup>+</sup>/CD44<sup>low</sup> cells was normalized to 1.

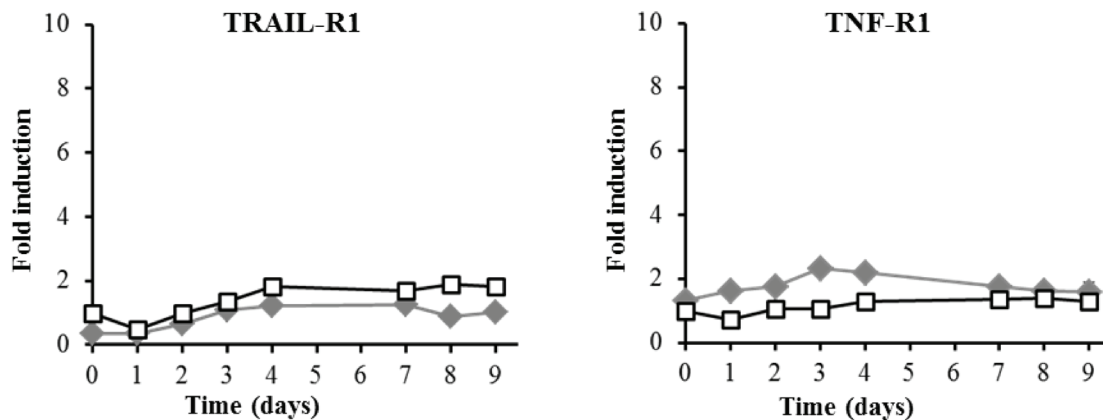

**Supplementary Figure 6: mRNA levels of TRAIL-R1 and TNF-R1 death receptors after a 10 Gy irradiation of CD24<sup>+</sup>/CD44<sup>low</sup> and CD24<sup>-low</sup>/CD44<sup>+</sup> cells.**

CD24<sup>+</sup>/CD44<sup>low</sup>

■ 0 Gy  
□ 10 Gy Day 4

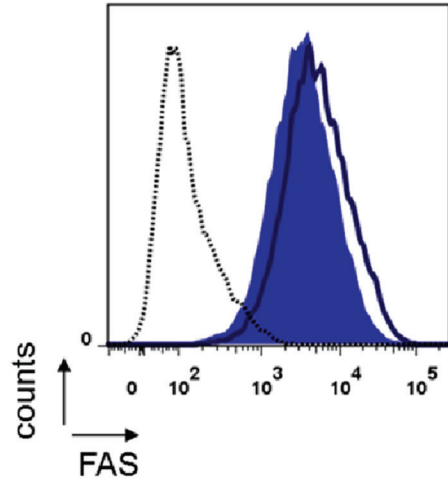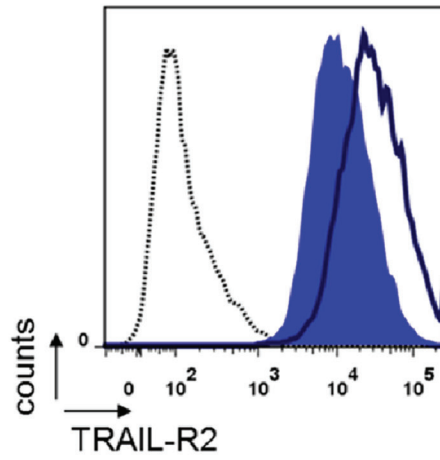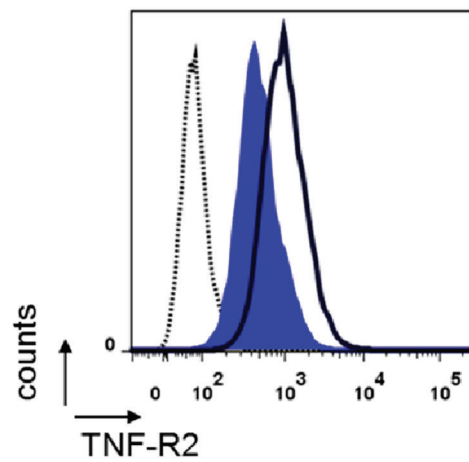

CD24<sup>-</sup>/CD44<sup>+</sup>

■ 0 Gy  
□ 10 Gy Day 4

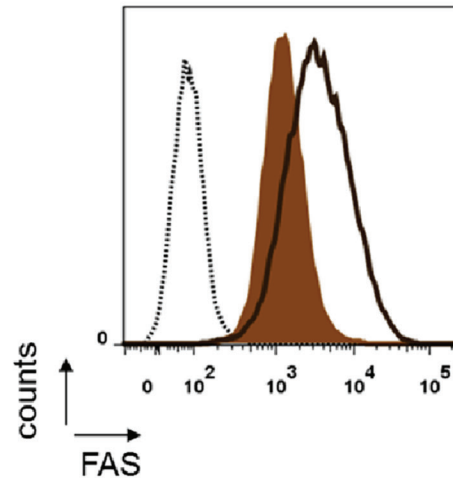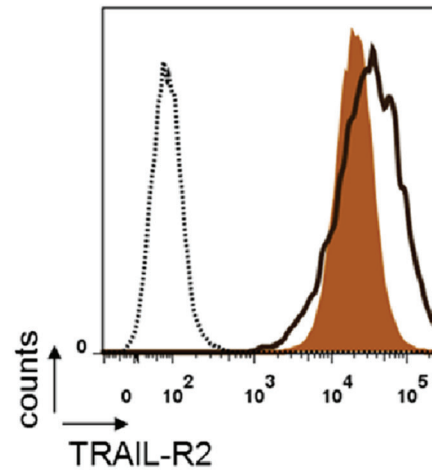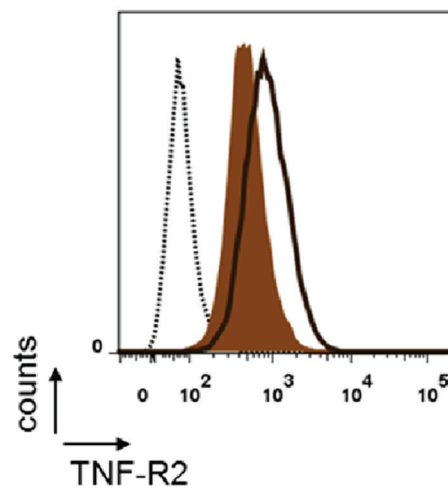

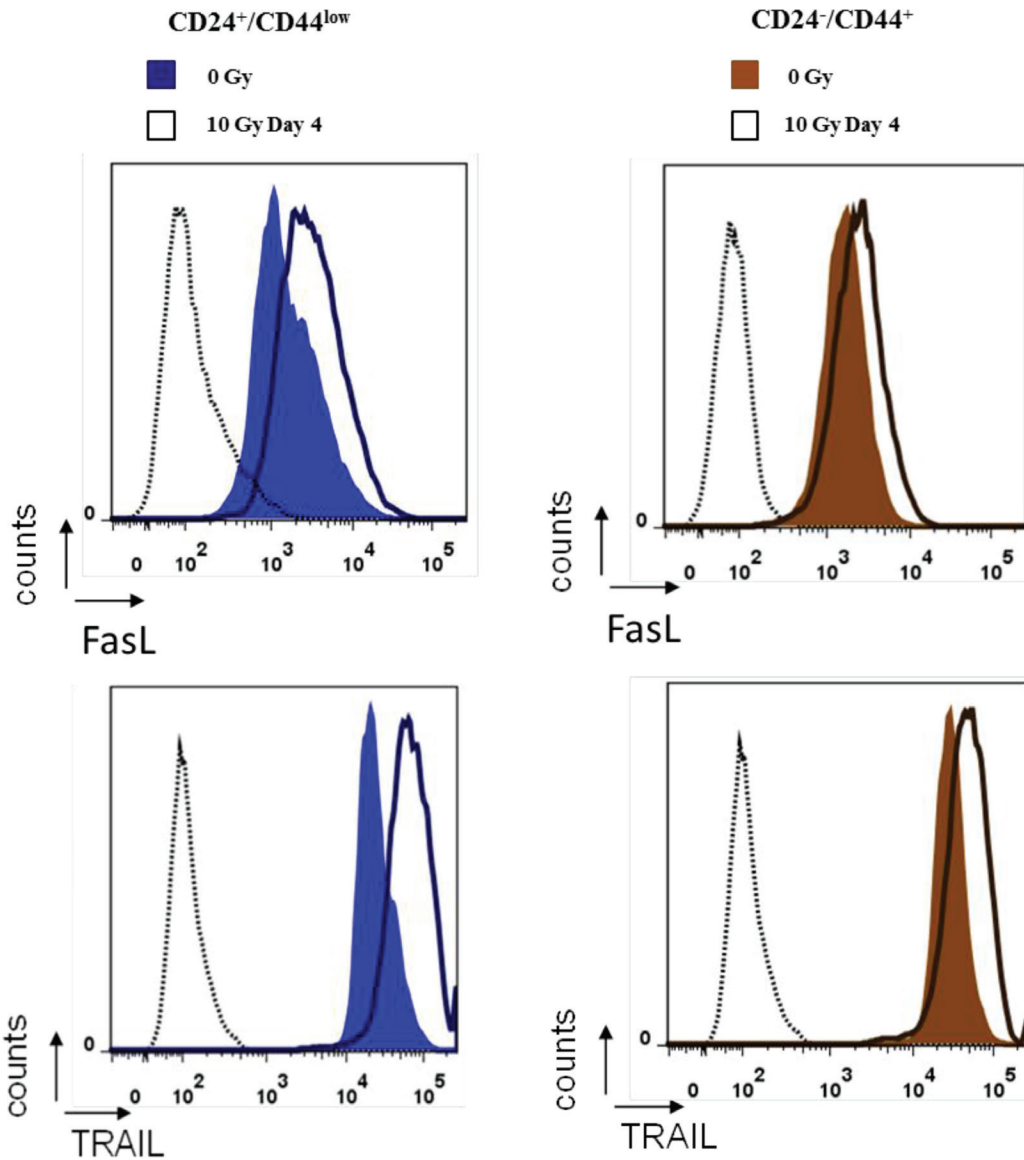

**Supplementary Figure 7: Flow cytometry characterization of the expression of Fas, TRAIL-R2, TNF-R2 death receptors and FasL, TRAIL ligands, 4 days after a 10 Gy irradiation of CD24<sup>+</sup>/CD44<sup>low</sup> and CD24<sup>-</sup>/CD44<sup>+</sup> cells. Similar results were obtained in 3 independent experiments.**

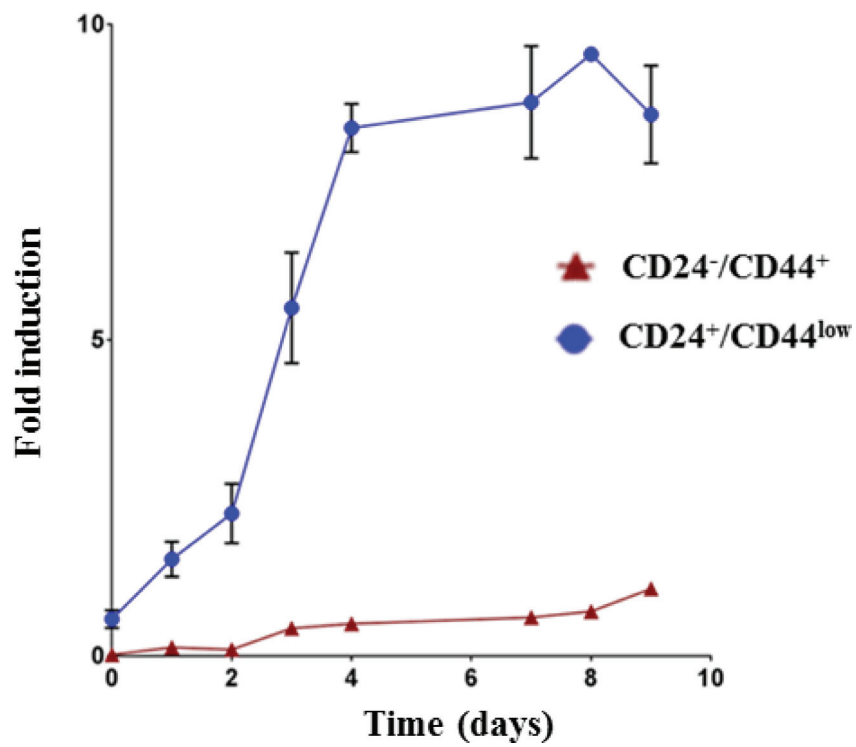

**Supplementary Figure 8: Analysis of TNF- $\alpha$  secretion in culture medium of 10 Gy-irradiated CD24<sup>+</sup>/CD44<sup>low</sup> and CD24<sup>-/low</sup>/CD44<sup>+</sup> cells.** TNF- $\alpha$  was quantified daily by ELISA in supernatant of irradiated and non-irradiated cell cultures. Each value corresponds to the mean of at least 2 independent measurements from 2 independent experiments. Error bars correspond to standard deviation.
